# Supplementary material for: CoA‐dependent activation of mitochondrial acyl carrier protein links four neurodegenerative diseases
Source: PubMed Central journal article supplement (PMC6895606; doi:10.15252/emmm.201910488), 2019-11-07
Supplement: EMMM-11-e10488-s003.pdf [file EMMM-11-e10488-s003.pdf]

## Source Data for Figure 4

Original blots used for Figures 4A

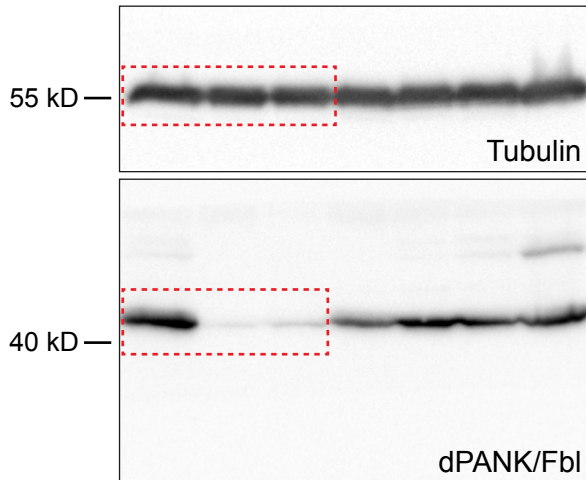

### Source data for Figure 4: Full gel images for Western blots presented in Figure 4A

Original images for the anti-dPANK/fbl / Tubulin Western blot presented in Figure 4A. Red dashed squares outline the parts used to assemble the Western in the main figure.
